# Supplementary material for: Neurological predictor scale is associated with academic achievement outcomes in long-term survivors of childhood brain tumors
Source: Springer Nature journal article supplement (doi:10.1007/s11060-018-03084-w), 2019-01-03
Supplement: MOESM1 [file 16373272]

**Supplementary Material S1. Neurological Predictor Scale**

Printed with permission of SAGE publisher from the original work:

Micklewright JL, King TZ, Morris RD, Krawiecki N (2008) Quantifying pediatric neuro-oncology risk factors: development of the neurological predictor scale. J Child Neurol 23 (4):455-458

*Neurological Predictor Scale Instructions:* Circle the number that corresponds to the statement that best describes the survivor’s exposure to the conditions or treatments listed in each of the four sections. *Please* read *all possible options,* and choose only

one response in each section.

**1. Circle the answer below that describes the child’s experience:**

**0** = Child has not been diagnosed with any conditions other than a brain tumor.

**1** = Child has been diagnosed with a hormone deficiency.

**2** = Child has been prescribed seizure medications *or* has been diagnosed with hydrocephalus.

**3** = Child has been diagnosed with hydrocephalus *and* a hormone deficiency.

**3** = Child has been prescribed seizure medications *and* diagnosed with a hormone deficiency.

**4** = Child has been prescribed seizure medications *and* diagnosed with hydrocephalus.

**2. Circle the answer below that describes the child’s brain tumor surgery. Please do not include hydrocephalus / shunt insertion surgeries in this section:**

**0** = Child did not undergo surgery to remove his/her brain tumor.

**1** = Child underwent biopsy/biopsies only; he/she did not have any other surgery.

**2** = Child underwent one neurosurgery related to the removal of his/her brain tumor. Child did *not* undergo a second surgery.

**3** = Child underwent more than one surgery related to the removal of his/her brain tumor.

**3. Circle the answer below that describes the child’s radiation treatment:**

**0** = Child did not undergo radiation treatment of any kind.

**1** = Child only received focal radiation or radiation at the site of his/her tumor.

**2** = Child received whole-brain or craniospinal radiation.

**3** = Child received both whole-brain radiation and focal radiation (a “boost”) at the site of the tumor.

**4. Circle the answer below that describes the child’s course of chemotherapy:**

**0** = Child did not receive chemotherapy of any kind.

**1** = Child received chemotherapy as part of his/her treatment.
